# Supplementary material for: Phenotypic and Molecular Characterization of Brazilian Capsicum Germplasm
Source: MDPI journal article supplement (doi:10.3390/agronomy11050854), 2021-04-27
Supplement: s1 [file s1]

# Supplementary Materials:

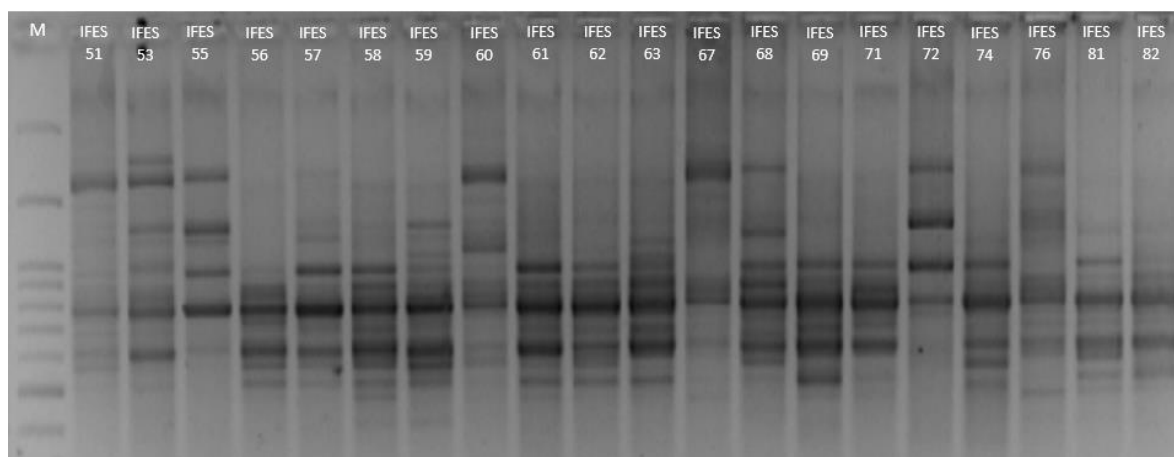

**Figure S1.** Representative sample of 2% agarose gel. DNA amplified fragments using ISSR marker 106. M—molecular weight marker, 100pb.

**Table S1.** Accession identification of 69 *Capsicum* accessions from Instituto Federal do Espírito Santo—Campus de Alegre germplasm collection.

| Accession ID | Origin               | Species                                          |
|--------------|----------------------|--------------------------------------------------|
| IFES 01      | Colatina, ES         | <i>Capsicum baccatum</i> var. <i>pendulum</i>    |
| IFES 02      | Colatina, ES         | <i>Capsicum chinense</i> Jacq.                   |
| IFES 03      | Domingos Martins, ES | <i>Capsicum chinense</i> Jacq.                   |
| IFES 04      | Domingos Martins, ES | <i>Capsicum chinense</i> Jacq.                   |
| IFES 05      | Muniz Freire, ES     | <i>Capsicum baccatum</i> var. <i>pendulum</i>    |
| IFES 06      | Muniz Freire, ES     | <i>Capsicum baccatum</i> var. <i>pendulum</i>    |
| IFES 07      | Alegre, ES           | <i>Capsicum chinense</i> Jacq.                   |
| IFES 08      | Alegre, ES           | <i>Capsicum chinense</i> Jacq.                   |
| IFES 09*     | Alegre, ES           | <i>Capsicum chinense</i> Jacq.                   |
| IFES 10      | Alegre, ES           | <i>Capsicum baccatum</i> var. <i>pendulum</i>    |
| IFES 12      | Alegre, ES           | <i>Capsicum baccatum</i> var. <i>pendulum</i>    |
| IFES 13      | Alegre, ES           | <i>Capsicum chinense</i> Jacq.                   |
| IFES 14      | Alegre, ES           | <i>Capsicum frutescens</i>                       |
| IFES 16      | Alegre, ES           | <i>Capsicum baccatum</i> var. <i>pendulum</i>    |
| IFES 17      | Alegre, ES           | <i>Capsicum chinense</i> Jacq.                   |
| IFES 22      | Alfredo Chaves, ES   | <i>Capsicum chinense</i> Jacq.                   |
| IFES 23      | Alfredo Chaves, ES   | <i>Capsicum chinense</i> Jacq.                   |
| IFES 24      | Anchieta, ES         | <i>Capsicum baccatum</i> var. <i>pendulum</i>    |
| IFES 25      | Alfredo Chaves, ES   | <i>Capsicum chinense</i> Jacq.                   |
| IFES 26      | Alfredo Chaves, ES   | <i>Capsicum chinense</i> Jacq.                   |
| IFES 27      | Anchieta, ES         | <i>Capsicum baccatum</i> var. <i>pendulum</i>    |
| IFES 28      | Anchieta, ES         | <i>Capsicum frutescens</i>                       |
| IFES 31      | Anchieta, ES         | <i>Capsicum annuum</i> var. <i>glabriusculum</i> |
| IFES 32      | Anchieta, ES         | <i>Capsicum chinense</i> Jacq.                   |
| IFES 33      | Anchieta, ES         | <i>Capsicum chinense</i> Jacq.                   |
| IFES 34      | Anchieta, ES         | <i>Capsicum chinense</i> Jacq.                   |
| IFES 35      | Anchieta, ES         | <i>Capsicum chinense</i> Jacq.                   |
| IFES 36      | Anchieta, ES         | <i>Capsicum chinense</i> Jacq.                   |
| IFES 37      | Anchieta, ES         | <i>Capsicum chinense</i> Jacq.                   |
| IFES 38      | Anchieta, ES         | <i>Capsicum chinense</i> Jacq.                   |

|           |                             |                                               |
|-----------|-----------------------------|-----------------------------------------------|
| IFES 39   | Anchieta, ES                | <i>Capsicum chinense</i> Jacq.                |
| IFES 40   | Anchieta, ES                | <i>Capsicum chinense</i> Jacq.                |
| IFES 41   | Anchieta, ES                | <i>Capsicum chinense</i> Jacq.                |
| IFES 43   | Anchieta, ES                | <i>Capsicum chinense</i> Jacq.                |
| IFES 44   | Anchieta, ES                | <i>Capsicum chinense</i> Jacq.                |
| IFES 47   | Alegre, ES                  | <i>Capsicum chinense</i> Jacq.                |
| IFES 48   | Alegre, ES                  | <i>Capsicum chinense</i> Jacq.                |
| IFES 49   | Alegre, ES                  | <i>Capsicum chinense</i> Jacq.                |
| IFES 50   | Alegre, ES                  | <i>Capsicum baccatum</i> var. <i>pendulum</i> |
| IFES 51*  | Alegre, ES                  | <i>Capsicum baccatum</i> var. <i>pendulum</i> |
| IFES 53   | Muniz Freire, ES            | <i>Capsicum chinense</i> Jacq.                |
| IFES 55   | Cachoeiro de Itapemirim, ES | <i>Capsicum frutescens</i>                    |
| IFES 56   | Viçosa, MG                  | <i>Capsicum chinense</i> Jacq.                |
| IFES 57   | Rio de Janeiro, RJ          | <i>Capsicum chinense</i> Jacq.                |
| IFES 58   | Campos, RJ                  | <i>Capsicum baccatum</i> var. <i>pendulum</i> |
| IFES 59   | Goiânia, GO                 | <i>Capsicum baccatum</i> var. <i>pendulum</i> |
| IFES 60   | Campos, RJ                  | <i>Capsicum baccatum</i> var. <i>pendulum</i> |
| IFES 61   | São Luiz, MA                | <i>Capsicum chinense</i> Jacq.                |
| IFES 62   | São Luiz, MA                | <i>Capsicum chinense</i> Jacq.                |
| IFES 63   | Ilhéus, BA                  | <i>Capsicum annuum</i> var. <i>annuum</i>     |
| IFES 67   | São Luiz, MA                | <i>Capsicum baccatum</i> var. <i>pendulum</i> |
| IFES 68   | Soure, PA                   | <i>Capsicum chinense</i> Jacq.                |
| IFES 69   | Bequimão, MA                | <i>Capsicum baccatum</i> var. <i>pendulum</i> |
| IFES 71   | São Luiz, MA                | <i>Capsicum baccatum</i> var. <i>pendulum</i> |
| IFES 72   | Miranda, MS                 | <i>Capsicum frutescens</i>                    |
| IFES 74   | Alegre, ES                  | <i>Capsicum chinense</i> Jacq.                |
| IFES 76   | Muniz Freire, ES            | <i>Capsicum baccatum</i> var. <i>pendulum</i> |
| IFES 81   | Campos, RJ                  | <i>Capsicum baccatum</i> var. <i>pendulum</i> |
| IFES 82   | Belém, PA                   | <i>Capsicum baccatum</i> var. <i>pendulum</i> |
| IFES 85   | Belém, PA                   | <i>Capsicum baccatum</i> var. <i>pendulum</i> |
| IFES 90   | Alegre, ES                  | <i>Capsicum baccatum</i> var. <i>pendulum</i> |
| IFES 91   | Venda Nova do Imigrante, ES | <i>Capsicum chinense</i> Jacq.                |
| IFES 92   | Venda Nova do Imigrante, ES | <i>Capsicum chinense</i> Jacq.                |
| IFES 93   | Cachoeiro de Itapemirim, ES | <i>Capsicum frutescens</i>                    |
| IFES 94   | Alegre, ES                  | <i>Capsicum baccatum</i> var. <i>pendulum</i> |
| IFES 95   | Alegre, ES                  | <i>Capsicum frutescens</i>                    |
| IFES 99*  | Alegre, ES                  | <i>Capsicum chinense</i> Jacq.                |
| IFES 100* | Alegre, ES                  | <i>Capsicum frutescens</i>                    |
| IFES 101* | Alegre, ES                  | <i>Capsicum baccatum</i> var. <i>pendulum</i> |

---

\*—Commercial variety; **Southeast Region:** ES—Espírito Santo, RJ—Rio de Janeiro, MG—Minas Gerais; **Midwest Region:** GO—Goiás, MS—Mato Grosso do Sul; **Northeast Region:** MA—Maranhão, BA—Bahia; **North Region:** PA—Pará

**Table S2.** Twenty-two qualitative descriptors used to phenotype 69 *Capsicum* accessions according to IPGRI (1995).

| Descriptor                        | Phenotype                                                                                                                                                                                                        |
|-----------------------------------|------------------------------------------------------------------------------------------------------------------------------------------------------------------------------------------------------------------|
| Growth habit                      | 3 = Prostrate; 5 = Intermediate (compact); 7 = Erect; 9 = Other;                                                                                                                                                 |
| Leaf shape                        | 1 = Deltoid; 2 = Ovate; 3 = Lanceolate;                                                                                                                                                                          |
| Stem shape                        | 1 = Cylindrical; 2 = Angled; 3 = Flattened;                                                                                                                                                                      |
| Nodal anthocyanin color           | 1 = Green; 3 = Light purple; 5 = Purple; 7 = Dark purple;                                                                                                                                                        |
| Stem pubescence                   | 3 = Sparse; 5 = Intermediate; 7 = Dense;                                                                                                                                                                         |
| Flower position                   | 3 = Pendant; 5 = Intermediate; 7 = Erect;                                                                                                                                                                        |
| Number of flowers per axillary    | 1 = one; 2 = two; 3 = three or more; 4 = many with short training; 5 = one and two; 6 = one, two, three; 7 = two or three and; 8 = two, three and four;                                                          |
| Anther color                      | 1 = White; 2 = Yellow; 3 = Light blue; 4 = Blue; 5 = Purple; 6 = other;                                                                                                                                          |
| Corolla color                     | 1 = White; 2 = Light yellow; 3 = Yellow; 4 = Greenish-yellow; 5 = Purple with white base; 6 = White with purple base; 7 = White with purple margin; 8 = Purple; 9 = Greenish-white; 10 = White with purple spot; |
| Corolla spot color                | 1 = White; 2 = Yellow; 3 = Greenish-yellow; 4 = Green; 5 = Violet; 6 = Without spot;                                                                                                                             |
| Filament color                    | 1 = White; 2 = yellow, 3 = green; 4 = blue; 5 = light violet; 6 = violet; 7 = blue violet;                                                                                                                       |
| Calyx pigmentation                | 0 = Absent; 1 = Present;                                                                                                                                                                                         |
| Calyx margin                      | 1 = Entire; 2 = Intermediate; 3 = Dentate; 4 = Other;                                                                                                                                                            |
| Fruit color at intermediate stage | 1 = White; 2 = Yellow; 3 = Green; 4 = Orange; 5 = Purple; 6 = Deep purple; 7 = Other;                                                                                                                            |
| Fruit color at mature stage       | 1 = White; 2 = Lemon-yellow; 3 = Light orange yellow; 4 = Orange-yellow; 5 = Light orange; 6 = Orange; 7 = Light red; 8 = Red; 9 = Dark red; 10 = Purple; 11 = Brown; 12 = Black; 13 = Other;                    |
| Fruit shape                       | 1 = Elongate; 2 = Almost Round; 3 = Triangular; 4 = Campanulate; 5 = Block; 6 = Other                                                                                                                            |
| Fruit surface                     | 1 = Smooth; 2 = Semiwrinkled; 3 = Wrinkled;                                                                                                                                                                      |
| Fruit shape at blossom end        | 1 = Pointy; 2 = Blunt; 3 = Sunken; 4 = Pointed and sunken; 5 = Other;                                                                                                                                            |
| Fruit shape at pedicel attachment | 1 = Acute; 2 = Obtuse; 3 = Truncate; 4 = Cordate; 5 = Lobate.                                                                                                                                                    |
| Fruit cross-sectional corrugation | 3 = Slightly corrugated; 5 = Intermediate; 7 = Corrugated;                                                                                                                                                       |
| Calyx constriction                | 0 = Absent; 1 = Present;                                                                                                                                                                                         |
| Capsaicin                         | 0 = Absente; 1 = Present.                                                                                                                                                                                        |

**Table S3.** Eleven quantitative descriptors used to phenotype 69 *Capsicum* accessions according to IPGRI (1995).

| Descriptor                 | Evaluation method                                                                                              |
|----------------------------|----------------------------------------------------------------------------------------------------------------|
| PH—Plant Height (cm)       | Measured from the soil surface to the highest point of the plant when 50% of the plants present mature fruits; |
| CD—Canopy diameter (cm)    | Measured after the first harvest between the broadest points of the canopy;                                    |
| SD—Stem Diameter (mm)      | Measured in the middle part of the first bifurcation;                                                          |
| LL—Leaf Length (cm)        | Measured on five fully developed leaves;                                                                       |
| LW—Leaf Width (cm)         | Measured on five fully developed leaves;                                                                       |
| PL—Petiole Length (cm)     | Measured on five completely developed leaves;                                                                  |
| FL—Fruit Length (mm)       | Measured in the longitudinal region of five mature fruits;                                                     |
| FD—Fruit Diameter (mm)     | Measured in the equatorial region of five mature fruits;                                                       |
| FFM—Fruit Fresh Mass (g)   | Measured in five mature fruits;                                                                                |
| PT—Pericarp Thickness (mm) | Measured of the highest fruit pulp thickness after a cross-section in five mature fruits;                      |
| FLD—Flower Diameter (mm)   | Measured in the largest diameter of the flower.                                                                |

**Table S4.** Information about 17 ISSR primers used in the genotyping of 69 *Capsicum* accessions from Instituto Federal do Espírito Santo—Campus de Alegre germplasm collection and 33 discarded primers.

| Primer            | Sequence (5'-3')                  | Annealing temperature | Range of amplicons (bp) | PIC                                    |                    |
|-------------------|-----------------------------------|-----------------------|-------------------------|----------------------------------------|--------------------|
| ISSR 8            | (AC) <sub>8</sub> G               | 52 °C                 | 350–1300                | 0.55                                   |                    |
| ISSR 47           | (CA) <sub>8</sub> G               | 48.5 °C               | 500–1000                | 0.43                                   |                    |
| ISSR 54           | (CAC) <sub>4</sub> RC             | 46 °C                 | 500–1000                | 0.73                                   |                    |
| ISSR 94           | (GGAGA) <sub>3</sub>              | 52 °C                 | 500–1000                | 0.83                                   |                    |
| ISSR 102          | (GT) <sub>6</sub> RG              | 46 °C                 | 200–1500                | 0.75                                   |                    |
| ISSR 106          | (GT) <sub>8</sub> CTC             | 46 °C                 | 250–1500                | 0.7                                    |                    |
| ISSR 137          | GGGC(GA) <sub>8</sub>             | 46 °C                 | 300–1000                | 0.54                                   |                    |
| UENF 01           | (GTG) <sub>5</sub>                | 50 °C                 | 400–1500                | 0.58                                   |                    |
| UENF 02           | CY(CA) <sub>8</sub>               | 50 °C                 | 300–1000                | 0.55                                   |                    |
| UENF 03           | CY(TGT) <sub>5</sub>              | 50 °C                 | 300–1500                | 0.55                                   |                    |
| UENF 04           | (AGG) <sub>5</sub> RC             | 50 °C                 | 250–1500                | 0.51                                   |                    |
| UENF 05           | (TCA) <sub>5</sub> RC             | 50 °C                 | 500–1000                | 0.59                                   |                    |
| UENF 06           | (AC) <sub>5</sub> G               | 50 °C                 | 350–1000                | 0.71                                   |                    |
| UENF 07           | (GAA) <sub>5</sub> RC             | 50 °C                 | 350–1200                | 0.41                                   |                    |
| UENF 08           | (GC) <sub>8</sub> T               | 50 °C                 | 500–1000                | 0.72                                   |                    |
| UENF 09           | (GCA) <sub>5</sub>                | 50 °C                 | 250–1500                | 0.63                                   |                    |
| UENF 10           | (GT) <sub>5</sub> A               | 50 °C                 | 300–1200                | 0.71                                   |                    |
| Discarded Primers |                                   |                       |                         |                                        |                    |
| Primer            | Sequence (5'-3')                  | Tested Temperature    | Primer                  | Sequence (5'-3')                       | Tested Temperature |
| VIT 01            | (GA) <sub>6</sub> CC              | 52 °C                 | ISSR 77                 | (CT) <sub>8</sub> TG                   | 52 °C              |
| VIT 05            | (AG) <sub>8</sub> YT              | 52 °C                 | ISSR 81                 | (AG) <sub>8</sub> YC                   | 52 °C              |
| VIT 06            | (AC) <sub>8</sub> CG              | 52 °C                 | IT 1                    | (CA) <sub>8</sub> GT                   | 47°C               |
| VIT 07            | (AC) <sub>8</sub> CT              | 52 °C                 | IT 2                    | (CA) <sub>8</sub> AC                   | 47°C               |
| VIT 19            | (AG) <sub>8</sub> YA              | 52 °C                 | IT 3                    | (CA) <sub>8</sub> AG                   | 47°C               |
| VIT 23            | (AC) <sub>8</sub> YG              | 52 °C                 | GOOFY                   | (GT) <sub>7</sub> YG                   | 47 °C              |
| VIT 32            | (AG) <sub>8</sub> C               | 52 °C                 | BECKY                   | (CA) <sub>7</sub> YC                   | 47 °C              |
| VIT 33            | (AG) <sub>8</sub> T               | 52 °C                 | JOHN                    | (AG) <sub>7</sub> YG                   | 47 °C              |
| VIT 45            | (GA) <sub>8</sub> CTT             | 52 °C                 | UBC 841                 | (GA) <sub>8</sub> YC                   | 51,5 °C            |
| VIT 50            | (AC) <sub>8</sub> C               | 52 °C                 | UBC 811                 | (GA) <sub>8</sub> C                    | 51,5 °C            |
| VIT 51            | (ATC) <sub>6</sub> T              | 52 °C                 | IFES 3                  | (GA) <sub>9</sub> C                    | 46 °C              |
| VIT 52            | (ATC) <sub>6</sub> C              | 52 °C                 | IFES 5                  | (CCG) <sub>6</sub>                     | 72 °C              |
| ISSR 13           | (AC) <sub>8</sub> YT              | 49.5 °C               | IFES 7                  | (TG) <sub>14</sub> TT(TG) <sub>3</sub> | 66 °C              |
| ISSR 14           | (AC) <sub>8</sub> YA              | 42°C                  | IFES 12                 | (AT) <sub>16</sub>                     | 36 °C              |
| ISSR 20           | (CA) <sub>7</sub>                 | 42°C                  | IFES 15                 | (CA) <sub>6</sub> R                    | 45 °C              |
| ISSR 29           | A <sub>3</sub> (AAT) <sub>4</sub> | 49.5 °C               | IFES 16                 | (CA) <sub>6</sub> RY                   | 45 °C              |
| ISSR 41           | (GT) <sub>6</sub> GG              | 49.5 °C               |                         |                                        |                    |

R = A, G; Y = C, T; PIC – Polymorphism Information Content.

**Table S5.** Descriptive analysis of 22 qualitative descriptor of 69 *Capsicum* populations from *Instituto Federal do Espírito Santo—Campus de Alegre* germplasm collection.

| Accession | Growth habit | Leaf shape | Stem Shape | Nodal Anthocyanin Color | Stem Pubescence | Flower Position | Number of Flowers per Axillary | Anther Color                | Corolla Color   |
|-----------|--------------|------------|------------|-------------------------|-----------------|-----------------|--------------------------------|-----------------------------|-----------------|
| IFES 01   | Intermediate | Ovate      | Angled     | Green                   | Sparse          | Intermediate    | One                            | Yellow with light blue spot | White           |
| IFES 02   | Erect        | Ovate      | Angled     | Light purple            | Sparse          | Intermediate    | Three or more                  | Violet                      | Greenish-white  |
| IFES 03   | Intermediate | Ovate      | Angled     | Purple                  | Sparse          | Erect           | One                            | Yellow with light blue spot | White           |
| IFES 04   | Intermediate | Deltoid    | Angled     | Purple                  | Sparse          | Intermediate    | Three or more                  | Violet                      | Greenish-white  |
| IFES 05   | Intermediate | Deltoid    | Angled     | Light purple            | Sparse          | Intermediate    | One                            | Yellow with light blue spot | White           |
| IFES 06   | Intermediate | Deltoid    | Angled     | Purple                  | Sparse          | Erect           | One                            | Yellow with light blue spot | White           |
| IFES 07   | Intermediate | Deltoid    | Angled     | Green                   | Sparse          | Intermediate    | Three or more                  | Violet                      | Greenish-white  |
| IFES 08   | Intermediate | Ovate      | Angled     | Green                   | Sparse          | Intermediate    | Three or more                  | Violet                      | Greenish-white  |
| IFES 09   | Intermediate | Ovate      | Angled     | Green                   | Sparse          | Erect           | Three or more                  | Violet                      | Greenish-white  |
| IFES 10   | Intermediate | Deltoid    | Angled     | Light purple            | Sparse          | Erect           | One                            | Yellow with light blue spot | White           |
| IFES 12   | Intermediate | Ovate      | Angled     | Green                   | Sparse          | Erect           | One                            | Yellow with light blue spot | White           |
| IFES 13   | Intermediate | Deltoid    | Angled     | Light Purple            | Sparse          | Erect           | Three or more                  | Violet                      | Greenish-white  |
| IFES 14   | Erect        | Deltoid    | Angled     | Light Purple            | Sparse          | Erect           | Two or three                   | Violet                      | Greenish-yellow |
| IFES 16   | Intermediate | Deltoid    | Angled     | Green                   | Sparse          | Erect           | One                            | Yellow with light blue spot | White           |
| IFES 17   | Intermediate | Deltoid    | Angled     | Light Purple            | Sparse          | Erect           | Three or more                  | Violet                      | Greenish-white  |
| IFES 22   | Intermediate | Deltoid    | Angled     | Light Purple            | Sparse          | Intermediate    | Three or more                  | Violet                      | Greenish-white  |
| IFES 23   | Intermediate | Deltoid    | Angled     | Green                   | Sparse          | Intermediate    | Three or more                  | Violet                      | Greenish-white  |
| IFES 24   | Intermediate | Deltoid    | Angled     | Purple                  | Sparse          | Erect           | One                            | Yellow with light blue spot | White           |
| IFES 25   | Intermediate | Deltoid    | Angled     | Green                   | Sparse          | Intermediate    | Three or more                  | Violet                      | Greenish-white  |
| IFES 26   | Intermediate | Ovate      | Angled     | Light Purple            | Sparse          | Pendant         | Three or more                  | Violet                      | Greenish-white  |
| IFES 27   | Intermediate | Ovate      | Angled     | Light Purple            | Sparse          | Erect           | One                            | Yellow with light blue spot | White           |
| IFES 28   | Erect        | Ovate      | Angled     | Light Purple            | Sparse          | Erect           | Two or three                   | Violet                      | Greenish-yellow |
| IFES 31   | Intermediate | Ovate      | Angled     | Purple                  | Sparse          | Erect           | One                            | Violet                      | Purple          |
| IFES 32   | Intermediate | Deltoid    | Angled     | Light Purple            | Sparse          | Intermediate    | Three or more                  | Violet                      | Greenish-white  |
| IFES 33   | Intermediate | Deltoid    | Angled     | Light Purple            | Sparse          | Intermediate    | Three or more                  | Violet                      | Greenish-white  |
| IFES 34   | Intermediate | Ovate      | Angled     | Green                   | Sparse          | Erect           | Three or more                  | Violet                      | Greenish-white  |
| IFES 35   | Intermediate | Ovate      | Angled     | Light Purple            | Sparse          | Intermediate    | Three or more                  | Violet                      | Greenish-white  |
| IFES 36   | Intermediate | Ovate      | Angled     | Green                   | Sparse          | Intermediate    | Three or more                  | Violet                      | Greenish-white  |

|         |              |            |        |               |        |              |               |                             |                 |
|---------|--------------|------------|--------|---------------|--------|--------------|---------------|-----------------------------|-----------------|
| IFES 37 | Intermediate | Ovate      | Angled | Purple        | Sparse | Intermediate | Three or more | Violet                      | Greenish-white  |
| IFES 38 | Prostrate    | Ovate      | Angled | Purple        | Sparse | Erect        | Three or more | Violet                      | Greenish-white  |
| IFES 39 | Intermediate | Ovate      | Angled | Light Purple  | Sparse | Intermediate | Three or more | Violet                      | Greenish-white  |
| IFES 40 | Intermediate | Lanceolate | Angled | Green         | Sparse | Intermediate | Three or more | Violet                      | Greenish-white  |
| IFES 41 | Intermediate | Deltoid    | Angled | Light Purple  | Sparse | Intermediate | Three or more | Violet                      | Greenish-white  |
| IFES 43 | Intermediate | Ovate      | Angled | Purple        | Sparse | Intermediate | Three or more | Violet                      | Greenish-white  |
| IFES 44 | Intermediate | Deltoid    | Angled | Light Purple  | Sparse | Intermediate | Three or more | Violet                      | Greenish-white  |
| IFES 47 | Intermediate | Ovate      | Angled | Light Purple  | Sparse | Intermediate | Three or more | Violet                      | Greenish-white  |
| IFES 48 | Intermediate | Ovate      | Angled | Purple escuro | Sparse | Erect        | Three or more | Violet                      | Greenish-white  |
| IFES 49 | Intermediate | Ovate      | Angled | Light Purple  | Sparse | Intermediate | Three or more | Violet                      | Greenish-white  |
| IFES 50 | Intermediate | Ovate      | Angled | Light Purple  | Sparse | Intermediate | One           | Yellow with light blue spot | White           |
| IFES 51 | Intermediate | Deltoid    | Angled | Green         | Sparse | Intermediate | One           | Yellow with light blue spot | White           |
| IFES 53 | Intermediate | Lanceolate | Angled | Light Purple  | Sparse | Intermediate | Three or more | Violet                      | Greenish-white  |
| IFES 55 | Erect        | Deltoid    | Angled | Light Purple  | Sparse | Erect        | Two or three  | Violet                      | Greenish-yellow |
| IFES 56 | Intermediate | Deltoid    | Angled | Light Purple  | Sparse | Intermediate | Three or more | Violet                      | Greenish-white  |
| IFES 57 | Erect        | Ovate      | Angled | Light Purple  | Sparse | Erect        | Three or more | Violet                      | Greenish-white  |
| IFES 58 | Intermediate | Deltoid    | Angled | Green         | Sparse | Intermediate | One           | Yellow with light blue spot | White           |
| IFES 59 | Intermediate | Deltoid    | Angled | Light Purple  | Sparse | Erect        | One           | Yellow with light blue spot | White           |
| IFES 60 | Prostrate    | Ovate      | Angled | Purple        | Sparse | Erect        | One           | Yellow with light blue spot | White           |
| IFES 61 | Intermediate | Lanceolate | Angled | Light Purple  | Sparse | Intermediate | Three or more | Violet                      | Greenish-white  |
| IFES 62 | Intermediate | Ovate      | Angled | Light Purple  | Sparse | Intermediate | Three or more | Violet                      | Greenish-white  |
| IFES 63 | Intermediate | Lanceolate | Angled | Light Purple  | Sparse | Intermediate | One           | Violet                      | White           |
| IFES 67 | Intermediate | Ovate      | Angled | Green         | Sparse | Erect        | One           | Yellow with light blue spot | White           |
| IFES 68 | Intermediate | Deltoid    | Angled | Purple        | Sparse | Pendant      | Three or more | Violet                      | Greenish-white  |
| IFES 69 | Intermediate | Ovate      | Angled | Dark purple   | Sparse | Intermediate | One           | Yellow with light blue spot | White           |
| IFES 71 | Intermediate | Ovate      | Angled | Dark purple   | Sparse | Intermediate | One           | Yellow with light blue spot | White           |
| IFES 72 | Erect        | Deltoid    | Angled | Green         | Sparse | Erect        | Two or three  | Violet                      | Greenish-yellow |
| IFES 74 | Intermediate | Ovate      | Angled | Green         | Sparse | Intermediate | Three or more | Violet                      | Greenish-white  |
| IFES 76 | Intermediate | Deltoid    | Angled | Light Purple  | Sparse | Erect        | One           | Yellow with light blue spot | White           |
| IFES 81 | Intermediate | Deltoid    | Angled | Light Purple  | Sparse | Erect        | One           | Yellow with light blue spot | White           |
| IFES 82 | Intermediate | Deltoid    | Angled | Light Purple  | Sparse | Intermediate | One           | Yellow with light blue spot | White           |
| IFES 85 | Intermediate | Ovate      | Angled | Light Purple  | Sparse | Erect        | One           | Yellow with light blue spot | White           |
| IFES 90 | Intermediate | Deltoid    | Angled | Light Purple  | Sparse | Intermediate | One           | Yellow with light blue spot | White           |

|                 |              |         |        |              |        |              |               |                             |                 |
|-----------------|--------------|---------|--------|--------------|--------|--------------|---------------|-----------------------------|-----------------|
| <b>IFES 91</b>  | Intermediate | Deltoid | Angled | Purple       | Sparse | Intermediate | Three or more | Violet                      | Greenish-white  |
| <b>IFES 92</b>  | Intermediate | Deltoid | Angled | Purple       | Sparse | Erect        | Three or more | Violet                      | Greenish-white  |
| <b>IFES 93</b>  | Erect        | Ovate   | Angled | Light Purple | Sparse | Erect        | Two or three  | Violet                      | Greenish-yellow |
| <b>IFES 94</b>  | Intermediate | Deltoid | Angled | Purple       | Sparse | Erect        | One           | Yellow with light blue spot | White           |
| <b>IFES 95</b>  | Erect        | Ovate   | Angled | Light Purple | Sparse | Erect        | Two or three  | Violet                      | Greenish-yellow |
| <b>IFES 99</b>  | Intermediate | Ovate   | Angled | Green        | Sparse | Intermediate | Three or more | Violet                      | Greenish-white  |
| <b>IFES 100</b> | Erect        | Ovate   | Angled | Light Purple | Sparse | Erect        | Two or three  | Violet                      | Greenish-yellow |
| <b>IFES 101</b> | Intermediate | Ovate   | Angled | Light Purple | Sparse | Intermediate | One           | Yellow with light blue spot | White           |



Continuation of Supplementary Table S5

| Accession | Corolla Spot Color | Filament Color | Calyx Pigmentation | Calyx margin | Fruit color at intermediate stage | Fruit color at mature stage | Fruit Shape  | Fruit Surface | Fruit shape at blossom end |
|-----------|--------------------|----------------|--------------------|--------------|-----------------------------------|-----------------------------|--------------|---------------|----------------------------|
| IFES 01   | Greenish-yellow    | White          | Present            | Intermediate | Orange                            | Red                         | Elongate     | Smooth        | Pointy                     |
| IFES 02   | Without spot       | Yellow         | Present            | Intermediate | Orange                            | Dark red                    | Block        | Semiwrinkled  | Sunken                     |
| IFES 03   | Without spot       | Yellow         | Present            | Dentate      | Orange                            | Red                         | Triangular   | Smooth        | Blunt                      |
| IFES 04   | Without spot       | Yellow         | Present            | Intermediate | Orange                            | Dark red                    | Triangular   | Smooth        | Pointy                     |
| IFES 05   | Greenish-yellow    | White          | Present            | Dentate      | Orange                            | Dark red                    | Elongate     | Semiwrinkled  | Pointy                     |
| IFES 06   | Greenish-yellow    | White          | Present            | Intermediate | Orange                            | Red                         | Elongate     | Smooth        | Pointy                     |
| IFES 07   | Without spot       | White          | Present            | Intermediate | Orange                            | Dark red                    | Almost round | Semiwrinkled  | Sunken                     |
| IFES 08   | Without spot       | White          | Present            | Intermediate | Orange                            | Dark red                    | Elongate     | Smooth        | Blunt                      |
| IFES 09   | Without spot       | White          | Present            | Intermediate | Green                             | Lemon-yellow                | Triangular   | Smooth        | Blunt                      |
| IFES 10   | Greenish-yellow    | White          | Present            | Intermediate | Orange                            | Red                         | Triangular   | Smooth        | Sunken                     |
| IFES 12   | Greenish-yellow    | White          | Present            | Intermediate | Orange                            | Light red                   | Elongate     | Smooth        | Pointy                     |
| IFES 13   | Without spot       | Yellow         | Present            | Intermediate | Orange                            | Light red                   | Elongate     | Smooth        | Pointy                     |
| IFES 14   | Without spot       | Yellow         | Present            | Intermediate | Green                             | Red                         | Elongate     | Semiwrinkled  | Pointy                     |
| IFES 16   | Greenish-yellow    | White          | Present            | Intermediate | Orange                            | Red                         | Triangular   | Smooth        | Pointy                     |
| IFES 17   | Without spot       | White          | Present            | Intermediate | Yellow                            | Lemon-yellow                | Triangular   | Smooth        | Blunt                      |
| IFES 22   | Without spot       | White          | Present            | Intermediate | Orange                            | Red                         | Almost round | Semiwrinkled  | Sunken                     |
| IFES 23   | Without spot       | White          | Present            | Intermediate | Yellow                            | Orange-yellow               | Block        | Smooth        | Sunken                     |
| IFES 24   | Greenish-yellow    | White          | Present            | Intermediate | Orange                            | Dark red                    | Triangular   | Smooth        | Sunken                     |
| IFES 25   | Without spot       | White          | Present            | Intermediate | Yellow                            | Light orange                | Almost round | Smooth        | Blunt                      |
| IFES 26   | Without spot       | Yellow         | Present            | Intermediate | Green                             | Orange-yellow               | Elongate     | Enrugado      | Pointy                     |
| IFES 27   | Greenish-yellow    | White          | Present            | Dentate      | Orange                            | Red                         | Elongate     | Smooth        | Pointy                     |
| IFES 28   | Without spot       | Yellow         | Present            | Intermediate | Orange                            | Red                         | Elongate     | Semiwrinkled  | Pointy                     |
| IFES 31   | Without spot       | Violeta        | Present            | Entire       | Deep purple                       | Dark red                    | Triangular   | Smooth        | Pointy                     |
| IFES 32   | Without spot       | White          | Present            | Intermediate | Orange                            | Orange                      | Triangular   | Semiwrinkled  | Pointy                     |
| IFES 33   | Without spot       | Yellow         | Present            | Dentate      | Orange                            | Dark red                    | Block        | Semiwrinkled  | Pointy e Sunken            |
| IFES 34   | Without spot       | Yellow         | Present            | Intermediate | Orange                            | Dark red                    | Triangular   | Semiwrinkled  | Pointy                     |
| IFES 35   | Without spot       | White          | Present            | Intermediate | Yellow                            | Light orange                | Triangular   | Smooth        | Pointy                     |
| IFES 36   | Without spot       | Yellow         | Present            | Intermediate | Orange                            | Dark red                    | Block        | Smooth        | Sunken                     |

|         |                 |        |         |              |             |               |              |              |                 |
|---------|-----------------|--------|---------|--------------|-------------|---------------|--------------|--------------|-----------------|
| IFES 37 | Without spot    | White  | Present | Intermediate | Orange      | Red           | Campanulate  | Semiwrinkled | Sunken          |
| IFES 38 | Without spot    | White  | Present | Intermediate | Yellow      | Orange        | Triangular   | Smooth       | Sunken          |
| IFES 39 | Without spot    | White  | Present | Intermediate | Orange      | Dark red      | Triangular   | Smooth       | Pointy          |
| IFES 40 | Without spot    | White  | Present | Intermediate | Green       | Dark red      | Triangular   | Smooth       | Pointy          |
| IFES 41 | Without spot    | Yellow | Present | Intermediate | Orange      | Red           | Triangular   | Smooth       | Pointy          |
| IFES 43 | Without spot    | Verde  | Present | Dentate      | Orange      | Dark red      | Block        | Semiwrinkled | Sunken          |
| IFES 44 | Without spot    | White  | Present | Intermediate | Green       | Light orange  | Campanulate  | Semiwrinkled | Pointy e Sunken |
| IFES 47 | Without spot    | Yellow | Present | Intermediate | Orange      | Red           | Block        | Semiwrinkled | Sunken          |
| IFES 48 | Without spot    | White  | Present | Intermediate | Orange      | Red           | Almost round | Smooth       | Blunt           |
| IFES 49 | Without spot    | White  | Present | Intermediate | Orange      | Dark red      | Triangular   | Smooth       | Pointy          |
| IFES 50 | Greenish-yellow | White  | Present | Intermediate | Orange      | Red           | Elongate     | Smooth       | Pointy          |
| IFES 51 | Greenish-yellow | White  | Present | Dentate      | Orange      | Red           | Triangular   | Semiwrinkled | Sunken          |
| IFES 53 | Without spot    | Yellow | Present | Intermediate | Orange      | Dark red      | Triangular   | Semiwrinkled | Blunt           |
| IFES 55 | Without spot    | Yellow | Present | Intermediate | Orange      | Red           | Elongate     | Semiwrinkled | Pointy          |
| IFES 56 | Without spot    | Yellow | Present | Intermediate | Orange      | Red           | Campanulate  | Semiwrinkled | Sunken          |
| IFES 57 | Without spot    | White  | Present | Intermediate | Orange      | Dark red      | Triangular   | Semiwrinkled | Blunt           |
| IFES 58 | Greenish-yellow | White  | Present | Dentate      | Orange      | Red           | Triangular   | Semiwrinkled | Sunken          |
| IFES 59 | Greenish-yellow | White  | Present | Intermediate | Orange      | Red           | Triangular   | Smooth       | Pointy          |
| IFES 60 | Greenish-yellow | White  | Present | Intermediate | Orange      | Dark red      | Elongate     | Smooth       | Pointy          |
| IFES 61 | Without spot    | White  | Present | Intermediate | Orange      | Dark red      | Triangular   | Smooth       | Pointy          |
| IFES 62 | Without spot    | White  | Present | Intermediate | Orange      | Dark red      | Triangular   | Smooth       | Pointy          |
| IFES 63 | Without spot    | White  | Present | Intermediate | Deep purple | Dark red      | Elongate     | Smooth       | Pointy          |
| IFES 67 | Greenish-yellow | White  | Present | Dentate      | Yellow      | Orange        | Elongate     | Smooth       | Pointy          |
| IFES 68 | Without spot    | White  | Present | Intermediate | Red         | Dark red      | Triangular   | Smooth       | Blunt           |
| IFES 69 | Greenish-yellow | White  | Present | Dentate      | Orange      | Red           | Elongate     | Smooth       | Pointy          |
| IFES 71 | Greenish-yellow | White  | Present | Intermediate | Orange      | Red           | Elongate     | Semiwrinkled | Pointy          |
| IFES 72 | Without spot    | Yellow | Present | Entire       | Red         | Orange-yellow | Elongate     | Semiwrinkled | Pointy          |
| IFES 74 | Without spot    | White  | Present | Intermediate | Yellow      | Orange        | Triangular   | Smooth       | Pointy          |
| IFES 76 | Greenish-yellow | White  | Present | Intermediate | Orange      | Dark red      | Elongate     | Smooth       | Pointy          |
| IFES 81 | Greenish-yellow | White  | Present | Intermediate | Orange      | Red           | Elongate     | Semiwrinkled | Pointy          |
| IFES 82 | Greenish-yellow | White  | Present | Dentate      | Orange      | Red           | Triangular   | Semiwrinkled | Sunken          |
| IFES 85 | Greenish-yellow | White  | Present | Dentate      | Orange      | Red           | Elongate     | Semiwrinkled | Pointy          |
| IFES 90 | Greenish-yellow | White  | Present | Dentate      | Orange      | Red           | Triangular   | Semiwrinkled | Sunken          |

|                 |                 |        |         |              |        |           |              |              |        |
|-----------------|-----------------|--------|---------|--------------|--------|-----------|--------------|--------------|--------|
| <b>IFES 91</b>  | Without spot    | White  | Present | Dentate      | Orange | Red       | Block        | Semiwrinkled | Sunken |
| <b>IFES 92</b>  | Without spot    | White  | Present | Intermediate | Orange | Dark red  | Triangular   | Smooth       | Sunken |
| <b>IFES 93</b>  | Without spot    | Yellow | Present | Entire       | Orange | Red       | Elongate     | Semiwrinkled | Pointy |
| <b>IFES 94</b>  | Greenish-yellow | White  | Present | Intermediate | Orange | Red       | Elongate     | Smooth       | Pointy |
| <b>IFES 95</b>  | Without spot    | White  | Present | Entire       | Orange | Red       | Elongate     | Semiwrinkled | Pointy |
| <b>IFES 99</b>  | Without spot    | White  | Present | Intermediate | Orange | Dark red  | Almost round | Smooth       | Blunt  |
| <b>IFES 100</b> | Without spot    | White  | Present | Intermediate | Orange | Red       | Elongate     | Semiwrinkled | Pointy |
| <b>IFES 101</b> | Greenish-yellow | White  | Present | Intermediate | Orange | Light red | Elongate     | Smooth       | Pointy |

---

Continuation of Supplementary Table S5

| Acession | Fruit cross-sectional corrugation | Calyx constriction | Capsaicin | Acession | Fruit cross-sectional corrugation | Calyx constriction | Capsaicin |
|----------|-----------------------------------|--------------------|-----------|----------|-----------------------------------|--------------------|-----------|
| IFES 01  | Slightly corrugated               | Absent             | Present   | IFES 47  | Corrugated                        | Present            | Absent    |
| IFES 02  | Corrugated                        | Present            | Absent    | IFES 48  | Slightly corrugated               | Present            | Present   |
| IFES 03  | Intermediate                      | Present            | Present   | IFES 49  | Slightly corrugated               | Present            | Present   |
| IFES 04  | Slightly corrugated               | Present            | Present   | IFES 50  | Slightly corrugated               | Absent             | Present   |
| IFES 05  | Slightly corrugated               | Absent             | Present   | IFES 51  | Corrugated                        | Absent             | Absent    |
| IFES 06  | Slightly corrugated               | Absent             | Present   | IFES 53  | Slightly corrugated               | Present            | Present   |
| IFES 07  | Corrugated                        | Present            | Present   | IFES 55  | Slightly corrugated               | Absent             | Present   |
| IFES 08  | Intermediate                      | Present            | Present   | IFES 56  | Corrugated                        | Present            | Absent    |
| IFES 09  | Slightly corrugated               | Present            | Present   | IFES 57  | Intermediate                      | Present            | Present   |
| IFES 10  | Slightly corrugated               | Absent             | Present   | IFES 58  | Corrugated                        | Absent             | Absent    |
| IFES 12  | Intermediate                      | Absent             | Present   | IFES 59  | Slightly corrugated               | Absent             | Present   |
| IFES 13  | Slightly corrugated               | Present            | Present   | IFES 60  | Intermediate                      | Absent             | Present   |
| IFES 14  | Slightly corrugated               | Absent             | Present   | IFES 61  | Slightly corrugated               | Present            | Present   |
| IFES 16  | Intermediate                      | Absent             | Present   | IFES 62  | Slightly corrugated               | Present            | Absent    |
| IFES 17  | Slightly corrugated               | Present            | Present   | IFES 63  | Slightly corrugated               | Absent             | Present   |
| IFES 22  | Corrugated                        | Present            | Present   | IFES 67  | Intermediate                      | Absent             | Present   |
| IFES 23  | Corrugated                        | Present            | Present   | IFES 68  | Slightly corrugated               | Present            | Present   |
| IFES 24  | Slightly corrugated               | Present            | Present   | IFES 69  | Intermediate                      | Absent             | Present   |
| IFES 25  | Slightly corrugated               | Present            | Present   | IFES 71  | Intermediate                      | Present            | Absent    |
| IFES 26  | Corrugated                        | Present            | Present   | IFES 72  | Slightly corrugated               | Absent             | Present   |
| IFES 27  | Intermediate                      | Absent             | Present   | IFES 74  | Slightly corrugated               | Absent             | Absent    |
| IFES 28  | Slightly corrugated               | Absent             | Present   | IFES 76  | Intermediate                      | Absent             | Present   |
| IFES 31  | Slightly corrugated               | Absent             | Present   | IFES 81  | Intermediate                      | Absent             | Present   |
| IFES 32  | Intermediate                      | Present            | Present   | IFES 82  | Corrugated                        | Absent             | Absent    |
| IFES 33  | Corrugated                        | Present            | Absent    | IFES 85  | Slightly corrugated               | Absent             | Present   |
| IFES 34  | Intermediate                      | Present            | Absent    | IFES 90  | Corrugated                        | Absent             | Absent    |
| IFES 35  | Slightly corrugated               | Present            | Absent    | IFES 91  | Corrugated                        | Present            | Present   |
| IFES 36  | Intermediate                      | Present            | Present   | IFES 92  | Slightly corrugated               | Present            | Present   |
| IFES 37  | Corrugated                        | Present            | Absent    | IFES 93  | Slightly corrugated               | Absent             | Present   |

|                |                     |         |         |                 |                     |         |         |
|----------------|---------------------|---------|---------|-----------------|---------------------|---------|---------|
| <b>IFES 38</b> | Slightly corrugated | Present | Present | <b>IFES 94</b>  | Slightly corrugated | Absent  | Present |
| <b>IFES 39</b> | Slightly corrugated | Present | Absent  | <b>IFES 95</b>  | Slightly corrugated | Absent  | Present |
| <b>IFES 40</b> | Slightly corrugated | Present | Present | <b>IFES 99</b>  | Slightly corrugated | Present | Present |
| <b>IFES 41</b> | Slightly corrugated | Present | Absent  | <b>IFES 100</b> | Slightly corrugated | Absent  | Present |
| <b>IFES 43</b> | Corrugated          | Present | Absent  | <b>IFES 101</b> | Slightly corrugated | Absent  | Present |
| <b>IFES 44</b> | Corrugated          | Present | Present |                 |                     |         |         |

---

**Table S6.** Grouping of 11 quantitative means of 69 *Capsicum* accessions by Scott-Knott method at 5% probability.

| Accession ID | PH    |   | CD    |   | SD    |   | LL    |   | LW   |   | PL   |   | FL    |   | FD    |   | FFM   |   | PT   |   | FLD   |   |
|--------------|-------|---|-------|---|-------|---|-------|---|------|---|------|---|-------|---|-------|---|-------|---|------|---|-------|---|
| IFES 01      | 41.67 | c | 46.33 | b | 14.63 | b | 9.80  | a | 4.32 | a | 5.67 | b | 7.08  | e | 12.67 | f | 5.86  | d | 2.05 | c | 12.46 | a |
| IFES 02      | 35.83 | d | 56.17 | b | 10.58 | b | 9.45  | a | 4.59 | a | 3.35 | c | 5.12  | f | 20.26 | d | 15.97 | c | 2.09 | c | 9.32  | b |
| IFES 03      | 43.22 | c | 61.22 | b | 15.29 | b | 10.37 | a | 4.91 | a | 3.53 | c | 3.36  | h | 22.93 | d | 5.12  | d | 1.96 | c | 12.09 | a |
| IFES 04      | 47.44 | c | 61.00 | b | 14.36 | b | 6.58  | b | 3.45 | b | 2.28 | c | 2.97  | h | 16.54 | e | 2.10  | e | 1.94 | c | 10.04 | b |
| IFES 05      | 58.67 | b | 73.33 | a | 15.13 | b | 10.49 | a | 4.61 | a | 3.64 | c | 8.05  | d | 15.11 | e | 6.22  | d | 1.90 | c | 13.55 | a |
| IFES 06      | 40.67 | c | 46.22 | b | 12.00 | b | 8.01  | b | 3.79 | b | 4.00 | b | 4.87  | f | 12.53 | f | 3.04  | e | 1.40 | c | 8.60  | b |
| IFES 07      | 55.33 | b | 68.67 | a | 18.87 | b | 7.70  | b | 3.55 | b | 2.31 | c | 1.14  | i | 18.14 | e | 2.29  | e | 1.94 | c | 8.22  | c |
| IFES 08      | 80.00 | a | 76.33 | a | 20.80 | a | 7.66  | b | 4.89 | a | 2.43 | c | 1.77  | i | 8.48  | g | 1.46  | e | 1.15 | d | 9.44  | b |
| IFES 09      | 20.33 | d | 24.67 | b | 13.63 | b | 6.14  | b | 1.79 | b | 2.29 | c | 3.62  | g | 17.79 | e | 4.30  | d | 1.55 | c | 8.78  | b |
| IFES 10      | 30.17 | d | 46.50 | b | 11.40 | b | 7.12  | b | 3.72 | b | 2.79 | c | 2.64  | h | 23.64 | d | 5.42  | d | 3.56 | a | 8.19  | c |
| IFES 12      | 55.00 | b | 51.00 | b | 16.08 | b | 7.10  | b | 3.58 | b | 4.88 | b | 10.29 | c | 15.35 | e | 7.63  | d | 1.47 | c | 11.69 | a |
| IFES 13      | 40.00 | c | 57.67 | b | 22.77 | a | 8.82  | b | 4.07 | a | 2.99 | c | 3.99  | g | 24.53 | d | 7.30  | d | 3.56 | a | 7.49  | c |
| IFES 14      | 66.67 | b | 44.03 | b | 16.13 | b | 8.23  | b | 4.05 | a | 2.11 | c | 3.89  | g | 3.95  | g | 1.29  | e | 2.52 | b | 7.21  | c |
| IFES 16      | 56.67 | b | 74.33 | a | 15.88 | b | 9.51  | a | 2.80 | b | 3.34 | c | 3.61  | g | 26.85 | c | 8.51  | d | 3.28 | a | 14.00 | a |
| IFES 17      | 60.00 | b | 62.83 | b | 15.78 | b | 7.85  | b | 3.64 | b | 7.35 | b | 1.75  | i | 11.49 | f | 1.09  | e | 1.43 | c | 6.83  | c |
| IFES 22      | 55.00 | b | 44.00 | b | 18.65 | b | 10.63 | a | 5.06 | a | 2.66 | c | 1.07  | i | 6.34  | g | 0.98  | e | 1.40 | c | 10.38 | b |
| IFES 23      | 47.33 | c | 56.00 | b | 12.43 | b | 7.36  | b | 3.59 | b | 1.88 | c | 1.79  | i | 15.57 | e | 1.61  | e | 1.72 | c | 5.73  | c |
| IFES 24      | 23.67 | d | 31.67 | b | 9.80  | b | 5.46  | b | 2.57 | b | 2.73 | c | 2.98  | h | 23.84 | d | 6.17  | d | 3.28 | a | 9.37  | b |
| IFES 25      | 52.00 | c | 46.50 | b | 16.45 | b | 8.97  | b | 4.89 | a | 2.45 | c | 1.51  | i | 17.05 | e | 2.23  | e | 1.85 | c | 8.91  | b |
| IFES 26      | 62.00 | b | 79.67 | a | 20.43 | a | 7.85  | b | 3.46 | b | 2.76 | c | 8.83  | d | 13.00 | f | 5.09  | d | 1.46 | c | 10.36 | b |
| IFES 27      | 50.67 | c | 58.50 | b | 16.87 | b | 8.99  | b | 3.97 | b | 3.53 | c | 5.38  | f | 16.00 | e | 6.55  | d | 1.91 | c | 10.48 | b |
| IFES 28      | 62.67 | b | 76.33 | a | 25.93 | a | 7.55  | b | 3.70 | b | 2.75 | c | 2.77  | h | 5.92  | g | 0.63  | e | 0.59 | d | 7.12  | c |
| IFES 31      | 19.67 | d | 22.17 | b | 6.78  | b | 12.13 | a | 3.61 | b | 1.77 | c | 2.76  | h | 11.69 | f | 1.90  | e | 1.46 | c | 10.38 | b |
| IFES 32      | 49.00 | c | 71.50 | a | 16.12 | b | 8.72  | b | 4.11 | a | 3.11 | c | 3.72  | g | 30.07 | c | 6.48  | d | 1.91 | c | 6.61  | c |
| IFES 33      | 49.33 | c | 81.00 | a | 14.43 | b | 8.57  | b | 4.38 | a | 3.92 | b | 5.06  | f | 47.42 | a | 30.94 | a | 2.08 | c | 12.29 | a |
| IFES 34      | 58.00 | b | 44.00 | b | 13.25 | b | 8.20  | b | 3.91 | b | 3.17 | c | 2.90  | h | 19.89 | d | 3.15  | e | 1.53 | c | 9.95  | b |
| IFES 35      | 43.33 | c | 56.33 | b | 17.87 | b | 6.78  | b | 2.90 | b | 2.01 | c | 2.78  | h | 13.71 | f | 1.52  | e | 1.41 | c | 8.94  | b |
| IFES 36      | 50.56 | c | 72.11 | a | 17.41 | b | 8.98  | b | 4.31 | a | 2.80 | c | 2.75  | h | 19.31 | d | 4.31  | d | 2.05 | c | 9.69  | b |
| IFES 37      | 41.00 | c | 73.67 | a | 14.30 | b | 15.22 | a | 5.41 | a | 3.62 | c | 5.45  | f | 38.09 | b | 14.54 | c | 2.01 | c | 10.24 | b |
| IFES 38      | 33.33 | d | 50.33 | b | 17.47 | b | 6.26  | b | 3.08 | b | 3.00 | c | 2.52  | h | 26.08 | c | 5.12  | d | 4.33 | a | 10.79 | b |
| IFES 39      | 45.33 | c | 67.33 | a | 19.20 | b | 7.70  | b | 3.59 | b | 1.91 | c | 2.83  | h | 11.27 | f | 1.89  | e | 1.83 | c | 5.68  | c |

|         |       |   |        |   |       |   |       |   |      |   |       |   |       |   |       |   |       |   |      |   |       |   |
|---------|-------|---|--------|---|-------|---|-------|---|------|---|-------|---|-------|---|-------|---|-------|---|------|---|-------|---|
| IFES 40 | 21.67 | d | 17.67  | b | 7.80  | b | 3.45  | b | 0.88 | b | 1.45  | c | 1.42  | i | 8.58  | g | 0.66  | e | 0.77 | d | 10.26 | b |
| IFES 41 | 40.00 | c | 50.33  | b | 17.23 | b | 7.11  | b | 3.39 | b | 2.14  | c | 2.72  | h | 17.45 | e | 1.82  | e | 1.71 | c | 7.93  | c |
| IFES 43 | 50.00 | c | 81.78  | a | 18.03 | b | 8.00  | b | 3.56 | b | 3.17  | c | 4.92  | f | 33.51 | c | 13.67 | c | 2.03 | c | 9.47  | b |
| IFES 44 | 60.00 | b | 66.33  | a | 16.30 | b | 10.00 | a | 5.31 | a | 3.45  | c | 4.41  | g | 33.59 | c | 10.77 | d | 2.07 | c | 8.79  | b |
| IFES 47 | 65.33 | b | 95.67  | a | 25.73 | a | 8.12  | b | 3.59 | b | 2.78  | c | 2.96  | h | 27.42 | c | 6.75  | d | 1.69 | c | 9.33  | b |
| IFES 48 | 67.50 | b | 86.50  | a | 16.55 | b | 7.57  | b | 3.19 | b | 5.56  | b | 2.97  | h | 14.81 | e | 1.31  | e | 1.86 | c | 8.89  | b |
| IFES 49 | 47.00 | c | 54.33  | b | 16.50 | b | 6.96  | b | 3.40 | b | 2.07  | c | 2.69  | h | 14.52 | e | 1.87  | e | 1.79 | c | 6.30  | c |
| IFES 50 | 37.67 | c | 48.33  | b | 18.13 | b | 8.75  | b | 3.91 | b | 4.17  | b | 6.32  | e | 9.53  | g | 5.17  | d | 1.69 | c | 14.34 | a |
| IFES 51 | 77.50 | a | 100.50 | a | 18.35 | b | 9.20  | a | 4.61 | a | 4.15  | b | 4.02  | g | 49.50 | a | 20.56 | b | 2.94 | b | 14.19 | a |
| IFES 53 | 38.33 | c | 43.33  | b | 7.27  | b | 7.06  | b | 3.11 | b | 1.88  | c | 1.76  | i | 13.52 | f | 0.93  | e | 1.31 | d | 12.28 | a |
| IFES 55 | 91.67 | a | 87.67  | a | 29.20 | a | 12.53 | a | 5.98 | a | 3.37  | c | 3.75  | g | 7.63  | g | 0.95  | e | 0.52 | d | 10.26 | b |
| IFES 56 | 65.00 | b | 83.00  | a | 21.60 | a | 10.02 | a | 4.50 | a | 3.32  | c | 4.03  | g | 29.45 | c | 7.00  | d | 1.83 | c | 8.73  | b |
| IFES 57 | 78.00 | a | 88.67  | a | 24.93 | a | 8.54  | b | 3.79 | b | 36.00 | a | 35.08 | a | 12.66 | f | 1.91  | e | 0.92 | d | 8.33  | c |
| IFES 58 | 58.67 | b | 70.00  | a | 20.87 | a | 9.85  | a | 4.39 | a | 4.94  | b | 6.27  | e | 41.27 | b | 19.34 | b | 2.37 | c | 12.37 | a |
| IFES 59 | 60.00 | b | 105.67 | a | 23.33 | a | 11.29 | a | 4.96 | a | 3.94  | b | 3.02  | h | 19.79 | d | 3.88  | e | 2.19 | c | 13.35 | a |
| IFES 60 | 43.67 | c | 57.22  | b | 14.16 | b | 9.80  | a | 4.16 | a | 5.11  | b | 5.84  | e | 14.99 | e | 4.47  | d | 1.86 | c | 12.10 | a |
| IFES 61 | 30.00 | d | 36.67  | b | 11.57 | b | 6.21  | b | 2.19 | b | 2.25  | c | 2.06  | i | 16.61 | e | 2.04  | e | 1.55 | c | 11.65 | a |
| IFES 62 | 52.89 | c | 73.00  | a | 14.41 | b | 8.09  | b | 3.98 | b | 2.16  | c | 2.67  | h | 16.96 | e | 2.25  | e | 2.07 | c | 9.89  | b |
| IFES 63 | 40.00 | c | 29.67  | b | 17.83 | b | 7.04  | b | 2.67 | b | 2.19  | c | 4.26  | g | 12.04 | f | 2.63  | e | 1.23 | d | 12.55 | a |
| IFES 67 | 55.50 | b | 67.00  | a | 18.70 | b | 12.45 | a | 4.78 | a | 6.30  | b | 12.79 | b | 28.24 | c | 22.33 | b | 2.23 | c | 16.46 | a |
| IFES 68 | 46.33 | c | 48.33  | b | 11.60 | b | 7.62  | b | 3.46 | b | 2.13  | c | 2.34  | h | 14.42 | e | 2.06  | e | 1.84 | c | 10.42 | b |
| IFES 69 | 65.00 | b | 89.00  | a | 20.32 | a | 10.21 | a | 4.95 | a | 5.59  | b | 10.97 | c | 22.11 | d | 16.24 | c | 2.28 | c | 10.89 | b |
| IFES 71 | 60.00 | b | 46.00  | b | 17.57 | b | 8.23  | b | 3.62 | b | 3.65  | c | 6.02  | e | 14.01 | f | 4.47  | d | 1.51 | c | 8.33  | c |
| IFES 72 | 88.00 | a | 84.50  | a | 20.73 | a | 11.42 | a | 5.37 | a | 3.34  | c | 1.86  | i | 4.47  | g | 0.40  | e | 0.97 | d | 10.33 | b |
| IFES 74 | 43.33 | c | 52.67  | b | 21.63 | a | 7.22  | b | 3.44 | b | 1.96  | c | 2.61  | h | 15.91 | e | 1.61  | e | 1.68 | c | 9.61  | b |
| IFES 76 | 72.50 | a | 73.50  | a | 24.05 | a | 8.84  | b | 4.01 | b | 3.24  | c | 6.03  | e | 18.87 | e | 5.27  | d | 1.62 | c | 13.29 | a |
| IFES 81 | 72.33 | a | 78.67  | a | 18.50 | b | 10.85 | a | 5.81 | a | 5.03  | b | 6.97  | e | 21.31 | d | 8.57  | d | 1.82 | c | 12.85 | a |
| IFES 82 | 67.22 | b | 72.78  | a | 19.70 | a | 10.80 | a | 4.42 | a | 5.35  | b | 4.98  | f | 48.26 | a | 21.28 | b | 2.57 | b | 13.48 | a |
| IFES 85 | 67.67 | b | 79.67  | a | 24.17 | a | 10.01 | a | 5.39 | a | 4.38  | b | 8.14  | d | 15.39 | e | 7.00  | d | 2.03 | c | 12.89 | a |
| IFES 90 | 47.89 | c | 57.11  | b | 17.88 | b | 10.42 | a | 4.14 | a | 4.18  | b | 3.75  | g | 45.43 | a | 17.18 | c | 2.32 | c | 12.37 | a |
| IFES 91 | 44.33 | c | 59.33  | b | 18.37 | b | 10.80 | a | 3.55 | b | 3.51  | c | 5.25  | f | 40.17 | b | 16.22 | c | 2.39 | c | 10.23 | b |
| IFES 92 | 42.83 | c | 76.67  | a | 18.08 | b | 7.69  | b | 4.51 | a | 3.05  | c | 2.45  | h | 25.82 | c | 6.50  | d | 3.52 | a | 10.62 | b |
| IFES 93 | 95.67 | a | 97.67  | a | 23.90 | a | 10.55 | a | 4.44 | a | 2.74  | c | 2.81  | h | 7.15  | g | 0.77  | e | 0.61 | d | 9.33  | b |

|                 |       |   |       |   |       |   |       |   |      |   |      |   |      |   |       |   |      |   |      |   |       |   |
|-----------------|-------|---|-------|---|-------|---|-------|---|------|---|------|---|------|---|-------|---|------|---|------|---|-------|---|
| <b>IFES 94</b>  | 64.33 | b | 79.33 | a | 18.37 | b | 11.09 | a | 5.36 | a | 4.89 | b | 4.46 | g | 23.38 | d | 7.80 | d | 2.53 | b | 12.77 | a |
| <b>IFES 95</b>  | 74.67 | a | 91.33 | a | 28.27 | a | 9.25  | a | 4.12 | a | 3.13 | c | 2.79 | h | 5.63  | g | 0.50 | e | 0.48 | d | 6.73  | c |
| <b>IFES 99</b>  | 53.67 | c | 55.33 | b | 17.00 | b | 6.35  | b | 3.14 | b | 2.33 | c | 1.27 | i | 13.90 | f | 1.42 | e | 1.66 | c | 8.77  | b |
| <b>IFES 100</b> | 50.67 | c | 60.00 | b | 17.37 | b | 9.08  | b | 4.06 | a | 2.67 | c | 2.66 | h | 5.93  | g | 0.38 | e | 0.35 | d | 8.77  | b |
| <b>IFES 101</b> | 50.00 | c | 50.00 | b | 15.25 | b | 8.55  | b | 3.72 | b | 4.25 | b | 8.49 | d | 12.41 | f | 6.29 | d | 1.78 | c | 11.25 | a |

---

PH—Plant Height (cm); CD—Crown Diameter (cm) SD—Stem Diameter (mm); LL—Leaf Length (cm); LW—Leaf Width (cm); PL—Petiole Length (cm) ; FL—Fruit Length (cm); FD—Fruit Diameter (mm); FFM—Fruit Fresh Mass (g); PT—Pericarp Thickness (mm); FLD—Flower Diameter (mm).
